# Supplementary material
Source: publisher figshare collection journal article supplement (https://tandf.figshare.com/ndownloader/files/13190366)
Supplement: Supplementary file 1 [file 13190366]

## Sheet: Sheet1
SUPPLEMENTAL GEOCHEMICAL DATA O.E. MCLEOD 2018
	WHOLE ROCK DATA
	SAMPLE					SiO2	TiO2	Al2O3	Fe2O3	MnO	MgO	CaO	Na2O	K2O	P2O5	LOI	Total			Total alkali	Ga	Rb	Sr	Y	Zr	Pb	Th	U	Sc	V	Cr	Ba	La	Ce	Pr	Nd	Ni	Cu	Zn	Nb	Tl	Co (PPM)	As (PPM)	Mo (PPM)	Sn (PPM)	Sb (PPM)	Cs (PPM)	S (PPM)	F (PPM)
	Field number	Otago ID	Type			%	%	%	%	%	%	%	%	%	%	%	%
	J6	85353	tephriphonolite			56.84	0.65	18.96	6.09	0.16	1.12	3.38	6.54	4.38	0.18	1.51	100.15			10.92	29	117	730	31	646	15	26	3	4	27	2	676	120	188		55	7	18	126	141	1	30	8	7	7	1	9	73	290
	R8	85348	tephriphonolite			55.7	0.6	18.42	6.15	0.19	1.07	3.85	5.43	4.96	0.2	2.15	99.01			10.39	28	174	778	35	635	18	34	5	5	20	0	694	118	183		53	6	16	118	163	1	26	8	8	12	5	2	0	245
	A3	85366	hawaiite			47.72	2.51	15.38	12.83	0.19	6.59	8.41	3.86	1.33	0.85	0.64	100.65			5.19	20	24	683	24	217	3	7	3	12	155	151	388	42	75		35	99	45	96	43	0	51	5	5	0	0	15	211	561
	R5	85347	tephriphonolite			56.11	0.61	18.63	6.15	0.18	1.28	3.19	6.54	4.69	0.21	1.54	99.45			11.23	29	166	606	29	644	14	26	6	4	21	0	688	106	175		51	6	15	113	130	1	30	7	7	5	0	0	142	456
	K3	85356	basanite			45.93	2.24	14.36	12.39	0.21	8.09	9.38	4.55	1.72	0.54	0.83	100.7			6.27	23	53	699	26	309	3	11	3	11	176	283	439	65	120		42	169	62	108	77	0	68	7	5	0	0	12	491	633
	SC1	85359	basanite			42.25	2.69	13.31	13.7	0.22	8.03	10.9	4.52	1.15	0.65	2.91	100.8			5.67	N/A	N/A	N/A	N/A	N/A	N/A	N/A	N/A	N/A	N/A	N/A	N/A	N/A	N/A		N/A	N/A	N/A	N/A	N/A	N/A	N/A	N/A	N/A	N/A	N/A	N/A	N/A	N/A
	GV1	85372	phonolite			55.73	0.21	19	6.33	0.24	0.45	1.03	10.55	4.88	0.02	0.78	99.54			15.43	47	266	157	68	1479	29	56	17	3	7	11	62	238	290		80	10	11	253	251	1	25	18	25	10	0	7	0	102
	N/A	85372b	phonolite			55.21	0.212	19.32	6.32038	2398	0.479	1.043	10.914	4.799	0.035	1.89	100.46			15.713	46	267	158	65	1466	28	53	15	3	6	7	63	227	270		77	8	14	240	237	1	26	16	15	10	1	9	0	136
	N/A	85367	hawaiite			46.23	2.531	15.25	12.7885	1800	6.625	8.527	3.741	1.3	0.836	2.07	100.291			5.041	22	27	663	26	208	3	7	3	14	159	152	388	37	81		37	103	46	94	40	0	44	5	5	0	0	15	314	794
	MICROPROBE DATA
	CLINOPYROXENE														OLIVINE
	Weight percent	Group : 2016-11-04	Sample : 2016-11-04_0022_QNT	Page	1																							FELDSPAR																AMPHIBOLE
	No.	CaO	TiO2	Na2O	MgO	SiO2	Al2O3	Cr2O3	FeO	MnO	Total	Comment			No.	CaO	TiO2	MgO	SiO2	NiO	Cr2O3	FeO	MnO	Total	Comment			No.	CaO	TiO2	Na2O	MgO	SiO2	Al2O3	K2O	BaO	FeO	SrO	Total	Comment				No.	CaO	TiO2	Na2O	MgO	SiO2
	1	24.728	0.253	0.257	17.23	54.299	0.678	0.296	2.928	0.056	100.725	Px1-01			1	0.129	0	49.626	41.076	0	0	9.5	0.111	100.442	SanCarlos-01			1	13.769	0.037	3.51	0.151	51.666	31.375	0.088	0	0.48	0	101.076	Plag-01				1	11.117	2.649	1.852	4.483	39.525
	2	24.598	0.25	0.232	17.341	54.153	0.671	0.244	2.927	0.056	100.472	Px1-02			2	0.11	0	49.625	40.71	0	0	9.696	0.14	100.281	SanCarlos-02			2	13.391	0.019	3.467	0.137	52.027	31.277	0.095	0	0.452	0	100.865	Plag-02				2	11.159	2.498	1.879	4.439	39.391
	3	1.237	0.076	0	27.72	54.423	1.031	0.789	15.695	0.491	101.462	Hypersthene-01			3	0.885	0.121	42.787	39.359	0	0.029	15.917	0.243	99.341	85357-Ol-01Core			3	0	0.002	1.036	0	65.212	19.21	15.004	0.959	0.046	0	101.469	Orth-01				3	22.343	1.348	1.099	8.46	47.198
	4	1.214	0.074	0.007	27.838	55.012	0.994	0.755	15.807	0.543	102.244	Hypersthene-02			4	10.932	1.514	17.377	39.688	0	0.032	14.908	0.31	84.761	85357-Ol-01Rim			4	0.017	0.007	1.02	0.007	64.545	18.941	15.239	0.913	0.008	0.007	100.704	Orth-02				4	22.93	1.473	0.812	8.547	47.598
	5	21.757	4.215	0.697	9.703	41.43	11.539	0	9.813	0.122	99.276	85357-01-core			5	0.293	0.01	45.045	39.653	0	0.009	14.412	0.191	99.613	85357-Ol-02core			5	12.124	0.121	3.982	0.063	52.531	29.693	0.321	0.085	0.611	0.312	99.843	85357-01-groundmass				5	23.325	1.782	0.676	10.174	46.74
	6	22.697	2.431	0.522	12.856	46.386	7.42	0.372	7.16	0.097	99.941	85357-01-rim			6	0.474	0.023	39.698	38.648	0	0.006	21.21	0.374	100.433	85357-Ol-02rim			6	9.495	0.156	5.428	0.098	53.342	28.103	1.042	0.14	0.901	0.435	99.14	85357-02-groundmass				6	23.021	1.721	0.617	10.001	47.296
	7	22.625	2.742	0.565	12.191	46.305	7.624	0.175	7.876	0.101	100.204	85357-02-core			7	0.238	0.036	36.414	37.643	0	0	25.728	0.397	100.456	85357-Ol-03core			7	12.372	0.12	3.891	0.073	52.194	30.075	0.313	0.044	0.751	0.292	100.125	85357-02-groundmassA				7	14.948	3.73	4.109	8.182	44.294
	8	22.428	3.977	0.622	10.845	43.461	9.758	0.024	8.716	0.11	99.941	85357-02-rim			8	0.375	0.02	43.056	39.161	0	0.031	17.616	0.257	100.516	85357-Ol-03rim			8	10.267	0.152	5.068	0.093	53.333	28.464	0.883	0.135	1.023	0.358	99.776	85357-02-groundmassB				8	5.931	0.141	10.603	1.477	52.265
	9	22.789	1.732	0.444	14.37	49.565	4.462	0.149	6.808	0.113	100.432	85357-03-core			9	0.172	0	41.207	38.789	0	0.017	19.287	0.289	99.761	85357-Ol-04core			9	11.756	0.128	4.268	0.069	52.502	29.193	0.35	0.08	0.763	0.327	99.436	85357-02-groundmassC				9	9.553	6.96	5.401	3.93	47.728
	10	22.544	2.931	0.454	11.984	46.165	7.377	0.042	8.791	0.138	100.426	85357-03-rim			10	0.208	0.009	43.006	39.328	0	0	17.849	0.239	100.639	85357-Ol-04rim			10	11.525	0.281	4.402	0.095	52.242	29.418	0.414	0.058	1.123	0.441	99.999	85357-02-groundmassD				10	24.249	1.568	0.83	8.029	44.749
	11	22.704	2.996	0.554	12.225	45.572	8.098	0.107	7.868	0.092	100.216	85357-04-core			11	0.228	0.008	46.851	40.104	0	0.098	13.081	0.183	100.553	85357-Ol-05core			11	11.261	0.541	4.246	2.278	52.715	22.105	2.532	0.226	3.337	0.412	99.653	85357-02-groundmassE				11	11.622	5.516	2.209	5.452	41.291
	12	22.594	3.509	0.535	11.147	44.213	9.465	0	8.79	0.096	100.349	85357-04-rim			12	0.284	0.001	44.331	39.646	0	0	15.203	0.243	99.708	85357-Ol-05rim			12	10.754	0.211	5.083	0.308	52.079	28.482	0.722	0.043	1.118	0.319	99.119	85357-02-groundmassF				12	22.052	1.216	2.238	8.213	42.936
	13	22.708	2.232	0.526	13.233	47.849	6.436	0.164	7.321	0.137	100.606	85357-05-core			13	0.227	0	46.577	40.179	0	0.063	13.238	0.15	100.434	85357-Ol-06core			13	11.769	0.135	4.226	0.076	53.107	29.405	0.385	0	0.626	0.409	100.138	85357-03-groundmassF				13	8.122	0.457	6.663	4.17	53.369
	14	22.537	3.26	0.566	12.094	45.344	8.554	0.273	8.193	0.141	100.962	85357-05-rim			14	0.3	0	43.992	39.432	0	0.051	15.676	0.186	99.637	85357-Ol-06rim			14	11.624	0.623	4.884	1.419	51.663	25.492	1.103	0.154	2.685	0.354	100.001	85357-03-groundmassB				14	10.292	2.148	3.156	6.321	46.617
	15	22.522	3.67	0.586	11.475	44.467	8.959	0.244	8.173	0.12	100.216	85357-06-core			15	0.285	0	45.874	39.733	0	0.04	13.958	0.18	100.07	85357-Ol-07core			15	13.268	0.767	4.346	2.443	50.686	24.214	0.604	0.083	3.252	0.182	99.845	85357-03-groundmassC				15	12.05	2.894	4.714	6.857	42.476
	16	22.674	3.597	0.52	11.686	44.309	8.796	0.086	8.367	0.063	100.098	85357-06-rim			16	0.393	0	43.114	39.16	0	0.065	17.154	0.245	100.131	85357-Ol-07rim			16	9.901	0.112	5.165	0.094	53.623	28.098	0.93	0.25	1.01	0.534	99.717	85357-03-groundmassD				16	20.184	1.33	1.32	10.91	48.93
	17	21.985	1.456	1.2	10.132	48.243	4.886	0	11.806	0.332	100.04	85357-07-core			17	0.223	0	46.187	39.983	0	0.049	13.084	0.142	99.668	85357-Ol-08core			17	11.628	0.146	4.461	0.094	52.611	29.538	0.439	0.022	0.924	0.386	100.249	85357-03-groundmassE				17	17.284	1.599	1.803	9.005	51.04
	18	22.791	2.858	0.504	12.504	45.799	7.823	0.205	7.559	0.065	100.108	85357-07-first rim			18	0.595	0.036	40.503	38.194	0	0.054	18.657	0.361	98.4	85357-Ol-08rim			18	11.349	0.162	4.646	0.098	53.144	28.869	0.424	0.079	0.919	0.391	100.081	85357-03-groundmassF				18	9.519	0.397	3.455	4.14	57.591
	19	22.703	3.018	0.546	11.706	45.183	8.435	0.053	8.423	0.116	100.183	85357-07-second rim			19	0.288	0	45.971	39.958	0	0.035	13.614	0.214	100.08	85357-Ol-09core			19	4.68	0.009	7.504	0	61.248	23.628	1.417	0.187	0.219	0.42	99.312	85352-01-phenocryst				19	16.397	3.246	2.241	8.674	41.667
	20	22.833	1.792	0.461	13.86	48.67	5.506	0.352	6.407	0.109	99.99	85357-08-core			20	2.597	0.011	29.635	32.611	0	0.006	25.823	0.677	91.36	85357-Ol-09rim			20	4.756	0.006	7.475	0	61.407	23.749	1.328	0.205	0.192	0.463	99.581	85352-01-phenocryst first rim				20	22.644	1.425	0.786	8.269	47.098
	21	22.096	2.414	0.706	11.777	47.617	7.393	0	8.194	0.126	100.323	85357-08-rim			21	0.236	0.006	41.873	38.781	0	0.023	18.307	0.305	99.531	85372-Ol-01core			21	4.583	0.028	7.237	0	61.647	23.583	1.61	0.165	0.281	0.46	99.594	85352-01-phenocryst second rim				21	7.957	1.685	5.996	4.005	52.579
	22	19.603	0.241	2.417	7.708	51.759	0.744	0.017	17.185	0.525	100.199	85357-09-core			22	0.35	0.013	44.117	39.705	0	0.006	15.518	0.24	99.949	85372-Ol-01rim			22	5.425	0	7.075	0.012	60.739	24.203	1.353	0.134	0.206	0.542	99.689	85352-02-phenocryst core				22	16.257	3.881	2.609	9.234	42.687
	23	22.884	2.529	0.507	12.85	46.612	7.247	0.125	7.346	0.085	100.185	85357-09-first rim			23	0.112	0	49.5	40.979	0	0.009	9.552	0.106	100.258	San Carlos-01			23	3.489	0.001	6.811	0.341	56.875	20.949	1.506	0.177	1.561	0.309	92.019	85352-02-phenocryst first rim				23	18.398	3.735	4.01	4.631	33.808
	24	22.571	4.536	0.58	10.624	42.016	10.709	0.024	8.897	0.096	100.053	85357-09-second rim			24	0.111	0	49.295	41.238	0	0.006	9.59	0.116	100.356	San Carlos-02			24	3.429	0.057	7.353	0.01	62.175	22.457	2.632	0.348	0.444	0.398	99.303	85352-02-phenocryst second rim				24	19.278	1.423	1.703	10.202	47.942
	25	22.243	4.536	0.588	11.727	45.024	8.546	0.05	8.386	0.115	99.96	85357-10-core																25	3.828	0	7.849	0	62.538	22.889	1.53	0.272	0.228	0.452	99.586	85352-03-phenocryst core				25	5.617	2.849	4.49	3.983	30.989
	26	22.644	4.327	0.544	10.677	42.768	10.166	0.053	8.38	0.113	99.672	85357-11-core			Minimum	0.11	0	17.377	32.611	0	0	9.5	0.106	84.761				26	5.437	0	6.65	0.27	58.645	24.19	0.972	0.198	1.269	0.608	98.239	85352-03-phenocryst rim				26	18.084	2.182	2.209	5.509	42.943
	27	22.567	3.405	0.445	11.987	45.106	8.22	0.089	8.221	0.092	100.132	85357-11-rim			Maximum	10.932	1.514	49.626	41.238	0	0.098	25.823	0.677	100.639				27	4.135	0.016	7.321	0.006	62.395	23.316	1.947	0.112	0.29	0.349	99.887	85352-04-phenocryst core				27	14.944	0.182	5.824	2.358	48.699
	28	21.182	0.509	0.758	8.376	50.342	1.942	0	16.869	0.613	100.591	85352-01-core			Average	0.835	0.075	42.736	39.323	0	0.026	15.774	0.246	99.016				28	4.369	0.008	7.313	0.016	61.979	23.414	1.907	0.088	0.26	0.382	99.736	85352-04-phenocryst coreB				28	6.82	0.051	12.425	0.983	46.928
	29	21.007	0.345	0.735	9.208	50.768	1.729	0.035	16.124	0.684	100.635	85352-01-rim			Sigma	2.208	0.307	7.013	1.675	0	0.026	4.43	0.123	3.547				29	4.166	0.038	7.328	0.027	61.834	23.2	2.017	0.361	0.39	0.629	99.99	85352-04-phenocryst rim				29	11.715	1.894	5.743	1.768	44.565
	30	24.683	0.26	0.225	17.169	54.189	0.681	0.202	2.711	0.083	100.203	Px1-01			No. of data 24													30	4.714	0.011	7.149	0.007	61.312	23.688	1.691	0.129	0.387	0.432	99.52	85352-05-phenocryst core				30	10.818	3.066	1.825	4.529	39.244
	31	1.205	0.071	0.012	27.678	54.804	0.971	0.787	15.631	0.533	101.692	Hypersthene-01																31	13.736	0.024	3.495	0.145	51.729	31.221	0.096	0.012	0.554	0	101.012	Plag-01				31	10.987	3.095	1.852	4.624	39.312
	32	20.958	0.26	0.726	7.484	50.285	1.463	0	18.585	0.751	100.512	85352-02-core																32	13.732	0.024	3.444	0.142	51.748	31.396	0.1	0	0.473	0	101.059	Plag-02
	33	21.119	0.292	0.761	7.914	50.426	1.498	0	17.852	0.679	100.541	85352-02-rim																33	0.01	0	1.044	0	64.855	19.144	15.032	0.853	0	0.007	100.945	Orth-01				Minimum	5.617	0.051	0.617	0.983	30.989
	34	21.154	0.266	0.742	7.659	50.124	1.579	0	18.279	0.662	100.465	85352-03-core																34	0.016	0.002	1.075	0	64.961	19.061	14.862	0.886	0	0	100.863	Orth-02				Maximum	24.249	6.96	12.425	10.91	57.591
	35	21.11	0.325	0.833	7.886	50.493	1.759	0	17.305	0.645	100.356	85352-03-adjacent core																35	4.457	0.031	7.418	0.011	61.735	23.529	1.616	0.219	0.279	0.488	99.783	85352-05-phenocryst rim				Average	14.826	2.198	3.392	6.179	45.145
	36	21.104	0.333	0.822	7.728	49.971	1.779	0.012	17.905	0.7	100.354	85352-03-rim																36	4.737	0.014	7.269	0.016	61.184	23.724	1.626	0.295	0.351	0.45	99.666	85352-05-phenocryst rimB				Sigma	5.855	1.527	2.805	2.83	5.612
	37	21.16	0.864	0.924	7.648	48.549	3.601	0.003	17.065	0.587	100.401	85352-04-core																37	4.579	0.019	7.262	0.01	61.568	23.385	1.742	0.164	0.241	0.535	99.505	85352-05-phenocryst coreB
	38	21.824	0.839	0.754	10.251	50.224	2.972	0	13.005	0.446	100.315	85352-04-rim																38	4.499	0.01	7.384	0.016	61.498	23.502	1.266	0.168	0.23	0.39	98.963	85352-06-phenocryst coreA
	39	20.717	0.31	0.854	7.178	49.849	1.869	0	18.749	0.759	100.285	85352-05-core																39	4.396	0.024	7.39	0.007	61.726	23.308	1.593	0.132	0.208	0.435	99.219	85352-06-phenocryst coreB
	40	21.259	0.488	0.8	7.598	49.624	2.168	0	17.928	0.626	100.491	85352-05-rim																40	4.461	0.038	7.365	0.015	61.75	23.203	1.607	0.149	0.49	0.25	99.328	85352-06-phenocryst rimA
	41	21.954	0.565	0.728	9.969	50.424	2.173	0.012	13.841	0.51	100.176	85352-05-second rim																41	4.797	0.03	7.519	0	61.65	23.796	1.343	0.166	0.279	0.567	100.147	85352-06-phenocryst first rim
	42	20.998	0.264	0.778	7.681	50.535	1.49	0	18.2	0.683	100.629	85352-06-core																42	4.591	0.047	7.365	0.019	61.744	23.598	1.798	0.288	0.478	0.362	100.29	85352-06-phenocryst second rim
	43	21.605	0.512	0.753	9.042	50.545	2.067	0.015	15.353	0.557	100.449	85352-06-rim																43	0.037	0	5.548	0	66.582	18.987	8.631	0	0.203	0	99.988	85372-01-phenocryst
	44	21.552	0.48	0.775	7.808	49.993	2.09	0	17.47	0.594	100.762	85352-07-px inclusion in plagioclase																44	0.808	0.011	6.42	0.005	65.699	20.083	6.408	0.095	0.166	0	99.695	85372-02-phenocryst
	45	21.494	0.451	0.758	7.846	50.244	1.961	0	17.651	0.72	101.125	85352-08-px inclusion in plagioclase																45	0.599	0.017	5.722	0	65.814	19.804	7.694	0.144	0.16	0.054	100.008	85372-03-phenocryst
	46	21.404	0.389	0.818	7.754	49.793	1.824	0	16.797	0.664	99.443	85352-09-core																46	0.092	0	5.125	0	66.138	19.03	9.145	0	0.219	0	99.749	85372-04-phenocryst
	47	21.636	0.677	0.785	8.877	50.079	2.517	0.009	15.524	0.59	100.694	85352-09-rim																47	1.081	0	16.039	0.003	44.078	32.713	4.168	0.007	0.398	0	98.487	85372-05-phenocrystA
	48	20.942	0.276	0.77	7.303	50.035	1.517	0	18.934	0.692	100.469	85352-10-core																48	0.097	0	24.085	0	37.794	31.49	0.244	0	0.281	0	93.991	85372-05-phenocrystB
	49	21.114	0.33	0.703	8.922	50.91	1.488	0	16.573	0.668	100.708	85352-11-coreA																49	0.366	0	23.569	0	38.08	31.664	0.235	0.035	0.395	0	94.344	85372-06-phenocryst
	50	21.322	0.493	0.68	8.915	50.133	2.165	0.061	16.2	0.568	100.537	85352-11-coreB																50	0.24	0.011	5.493	0	66.12	19.377	8.372	0.078	0.131	0.084	99.906	85372-07-phenocryst
	51	21.247	0.339	0.881	7.754	49.995	1.828	0.006	17.708	0.69	100.448	85352-11-coreC																51	0.083	0	5.219	0	66.189	18.816	8.968	0.031	0.212	0	99.518	85372-08-phenocryst
	52	23.067	0.546	0.703	9.519	48.872	2.048	0	13.663	0.526	98.944	85352-11-rim on C																52	0.079	0.003	5.351	0.006	66.149	19.052	8.5	0	0.197	0	99.337	85372-08-phenocrystB
	53	22.004	2.619	0.572	12.496	46.413	7.414	0	8.083	0.137	99.738	85352-12-core-opx																53	0.111	0.003	16.118	0.006	45.485	32.173	4.076	0	0.739	0	98.711	85372-08-phenocrystC
	54	22.123	2.57	0.611	12.512	46.58	7.25	0.021	8.077	0.117	99.861	85352-12-coreB-opx																54	0.194	0	5.223	0.014	66.112	19.172	8.789	0.028	0.217	0	99.749	85372-09-phenocryst
	55	21.993	2.277	0.671	12.383	47.338	6.118	0.042	8.949	0.202	99.973	85352-12-coreC-opx																55	0.122	0.004	24.033	0	37.7	31.966	0.26	0	0.218	0.016	94.319	85372-10-phenocryst
	56	22.068	2.891	0.639	11.996	45.963	7.45	0.015	8.281	0.144	99.447	85352-12-coreD-opx																56	0.11	0	23.865	0	37.977	31.597	0.288	0	0.319	0	94.156	85372-10-phenocryst
	57	21.986	0.571	0.779	10.044	50.647	2.178	0	13.685	0.503	100.393	85352-12-rimA-opx																57	0.295	0.001	15.875	0	44.42	32.537	4.242	0	0.464	0	97.834	85372-11-phenocrystA
																												58	0.289	0.005	5.663	0	66.29	19.417	8.211	0.031	0.151	0	100.057	85372-11-phenocrystB
	59	21.814	0.672	0.781	9.99	50.301	2.544	0.015	13.883	0.49	100.49	85352-12-rimC-opx																59	0.089	0	5.541	0.01	66.132	18.91	8.237	0	0.279	0	99.198	85372-12-phenocryst
	60	21.878	0.531	0.709	10.247	50.815	2.118	0.015	13.609	0.466	100.388	85352-12-rimD-opx																60	0.083	0.009	5.471	0	66.183	18.916	8.527	0.006	0.235	0	99.43	85372-13-phenocryst
	61	21.887	1.585	0.765	11.677	49.089	3.889	0.027	10.105	0.274	99.298	85372-01-coreA-xenocrysts																61	3.18	0.002	8.447	0	63.114	22.557	1.149	0.318	0.221	0.328	99.316	85372-14-phenocryst
	62	21.633	3.321	1.007	10.379	45.563	7.015	0.015	10.892	0.235	100.06	85372-01-coreB-xenocrysts																62	13.687	0.025	3.452	0.133	51.654	31.194	0.102	0.009	0.483	0	100.739	Plag-01
	63	22.596	1.492	0.732	13.141	50.253	3.665	0.033	8.345	0.193	100.45	85372-01-coreC-xenocrysts																63	13.769	0.027	3.419	0.178	51.719	31.293	0.098	0	0.524	0	101.027	Plag-02
	64	18.522	0.142	2.472	2.66	49.237	1.068	0.051	25.182	1.17	100.504	85372-01-rimA-xenocrysts																64	0.008	0	1.016	0	65.085	19.134	14.938	0.854	0	0	101.035	Orth-01
	65	18.623	0.187	2.585	2.534	49.324	1.017	0.04	25.142	1.215	100.667	85372-01-rimB-xenocrysts																65	0.003	0.016	1.007	0	64.706	19.013	15.125	0.872	0	0	100.742	Orth-02
	66	19.135	0.189	2.271	2.963	49.006	1.1	0	24.634	1.157	100.455	85372-01-rimC-xenocrysts																66	0.158	0	16.285	0	46.657	31.698	3.393	0	0.74	0	98.931	85372-15-coarse feldspar matrix in nodu
	67	21.72	3.299	1.026	10.804	45.952	6.54	0	10.489	0.196	100.026	85372-01-coreD-xenocrysts																67	0.197	0	16.265	0	45.396	32.246	3.971	0	0.834	0	98.909	85372-15-coarse feldspar matrix in nodu
	68	22.025	2.973	0.615	12.313	45.72	8.088	0.244	7.792	0.1	99.87	85372-01-first rim of D-xenocrysts																68	0.21	0.013	16.322	0.005	45.521	32.32	3.982	0	0.76	0	99.133	85372-15-coarse feldspar matrix in nodu
	69	18.49	0.137	2.592	3.019	49.826	0.988	0.088	24.781	1.194	101.115	85372-01-second rim of D-xenocrysts
	70	18.092	0.101	2.696	1.784	49.118	0.968	0	26.721	1.235	100.715	85372-02-core																Minimum	0	0	1.007	0	37.7	18.816	0.088	0	0	0	92.019
	71	20.59	0.146	1.389	4.76	49.835	1.187	0.02	22.143	0.987	101.057	85372-02-first rim																Maximum	13.769	0.767	24.085	2.443	66.582	32.713	15.239	0.959	3.337	0.629	101.469
	72	20.972	0.16	1.163	5.992	50.029	1.232	0.009	20.138	0.919	100.614	85372-02-second rim																Average	4.989	0.063	7.335	0.133	56.985	25.224	3.695	0.169	0.557	0.214	99.364
	73	20.988	0.142	1.188	5.631	49.786	1.147	0	20.763	0.922	100.567	85372-02-third rim																Sigma	4.992	0.14	5.518	0.431	8.168	4.841	4.503	0.246	0.644	0.216	1.755
	74	22.034	1.913	0.497	13.554	48.565	5.136	0.072	7.8	0.106	99.677	85372-03-core																No. of data 68
	75	21.38	0.191	0.96	7.285	50.525	1.24	0	18.23	0.801	100.612	85372-03-rim
	76	22.407	1.964	0.411	13.829	48.985	4.672	0.045	7.401	0.12	99.834	85372-03-coreB
	77	21.342	0.244	1.077	7.123	50.065	1.556	0.099	18.169	0.766	100.441	85372-03-rimB
	78	24.752	0.267	0.228	17.357	54.304	0.724	0.248	2.893	0.04	100.813	Px1-01
	79	1.231	0.09	0.023	27.494	54.738	1.015	0.777	15.593	0.509	101.47	Hypersthene-01
	80	1.201	0.09	0.015	27.556	54.816	1.033	0.775	15.808	0.526	101.82	Hypersthene-02
	81	24.764	0.242	0.22	17.126	54.197	0.674	0.264	2.915	0.061	100.463	Px1-02
	Minimum	1.201	0.071	0	1.784	41.43	0.671	0	2.711	0.04	98.032
	Maximum	24.764	4.536	2.696	27.838	55.012	11.539	0.789	26.721	1.235	102.244
	Average	20.484	1.356	0.793	11.144	49.048	3.986	0.108	13.004	0.429	100.352
	Sigma	5.16	1.354	0.574	5.402	3.136	3.167	0.196	5.826	0.332	0.598
	No. of data 81
[truncated: 7 more columns]
